# Supplementary material for: Photocatalytic degradation of different antibiotics using TiO2–carbon composites: a case study of tetracycline and ciprofloxacin
Source: Royal Society of Chemistry journal article supplement (doi:10.1039/d3nj02748a), 2023-01-01
Supplement: d3nj02748a1.pdf [file d3nj02748a1.pdf]

## Supporting Information

### Photocatalytic degradation of different antibiotics by TiO<sub>2</sub>-carbon composites: a case study of tetracycline and ciprofloxacin

Chengyue Tian <sup>a</sup>, Wenyu Huang <sup>a, d, \*</sup>, Zishen Wei <sup>a</sup>, Chen Liang <sup>a</sup>, Yiwu Dong <sup>a</sup>, Ji Shi <sup>c</sup>, Xinyun Zhang <sup>a</sup>,  
Guoyou Nong <sup>a</sup>, Shuangfei Wang <sup>b, d</sup>, Jing Xu <sup>e</sup>

<sup>a</sup> School of Resources, Environment and Materials, Guangxi University, Nanning, 530004, China

<sup>b</sup> School of Light Industry and Food Engineering, Guangxi University, Nanning, 530004, China

<sup>c</sup> School of chemistry and chemical engineering, Guangxi Minzu University, Nanning, 530006, China

<sup>d</sup> Guangxi Bossco Environmental Protection Technology Co.,Ltd, Nanning, 530007, China

<sup>e</sup> State Key Laboratory of Water Resources and Hydropower Engineering Science, Wuhan University, Wuhan, 430072, China

## List of Supporting Information

### Texts

**Text S1** Materials

**Text S2** Synthesis of photocatalysts

**Text S3** Characterization and Photoelectrochemical measurements

**Text S4** Photocatalytic activity

**Text S5** XPS

**Text S6** Zeta

### Tables

**Tab. S1.** Fukui calculation results of TC molecular.

**Tab. S2.** Fukui calculation results of CIP molecular.

**Tab. S3.** Potential intermediates in the TC photocatalytic degradation by H<sub>2</sub>/T-BC.

**Tab. S4.** Potential intermediates in the TC photocatalytic degradation by H<sub>2</sub>/T-BC under acidic conditions.

**Tab. S5.** Potential intermediates in the TC photocatalytic degradation by H<sub>2</sub>/T-BC under neutral conditions.

**Tab. S6.** Potential intermediates in the TC photocatalytic degradation by H<sub>2</sub>/T-BC under alkalinity conditions.

**Tab. S7.** Potential intermediates in the CIP photocatalytic degradation by H<sub>2</sub>/T-BC.

**Tab. S8.** Potential intermediates in the CIP photocatalytic degradation by H<sub>2</sub>/T-BC under acidic conditions.

**Tab. S9.** Potential intermediates in the CIP photocatalytic degradation by H<sub>2</sub>/T-BC under neutral conditions.

**Tab. S10.** Potential intermediates in the CIP photocatalytic degradation by H<sub>2</sub>/T-BC under alkalinity conditions.

**Tab. S11.** Contribution rates of active species for organic pollutants degradation.

### Figures

**Fig. S1.** XRD of H<sub>2</sub>/BC.

**Fig. S2.** Effect of different materials on degrading (a) TC, (b) CIP, and the reaction rate of (c)TC, (d) CIP.

**Fig. S3.** The reaction rate of (a) TC, (b) CIP at different pH, and (c)TC, (d) CIP at different dosages of H<sub>2</sub>/T-BC.

**Fig. S4.** The pKa of (a) TC and (b) CIP: The surface charge of antibiotics under different pH conditions.

**Fig. S5.** Degradation of (a) TC, (b) CIP at different initial concentrations, and the reaction rate of (c)TC, (d) CIP.

**Fig. S6.** MS<sup>2</sup> spectra of intermediate products resulting from TC photocatalytic degradation

**Fig. S7.** MS<sup>2</sup> spectra of intermediate products resulting from TC photocatalytic degradation under acidic conditions.

**Fig. S8.** MS<sup>2</sup> spectra of intermediate products resulting from TC photocatalytic degradation under neutral conditions.

**Fig. S9.** MS<sup>2</sup> spectra of intermediate products resulting from TC photocatalytic degradation under alkaline conditions.

**Fig. S10.** MS<sup>2</sup> spectra of intermediate products resulting from CIP photocatalytic degradation.

**Fig. S11.** MS<sup>2</sup> spectra of intermediate products resulting from CIP photocatalytic degradation under acidic conditions.

**Fig. S12.** MS<sup>2</sup> spectra of intermediate products resulting from CIP photocatalytic degradation under neutral conditions.

**Fig. S13.** MS<sup>2</sup> spectra of intermediate products resulting from CIP photocatalytic degradation under alkaline conditions.

## Text S1 Materials

Bagasse (Sugar Mill, Guangxi, China), titanium butoxide (AR), ciprofloxacin (AR), tetracycline (AR), and triethylene diamine (DABCO, AR) were provided by Macklin. Ethanol (AR) was provided by KESHI. Methanol (HPLC) and acetonitrile (HPLC) were provided by Fisher Chemical. Potassium bromate (AR), sodium sulfate anhydrous (AR), tert-Butyl alcohol (TBA, AR), ethylenediaminetetraacetic acid disodium salt (EDTA-2Na, AR), oxalic acid dihydrate (AR), phosphoric acid (HPLC) were respectively provided by several chemical plants, Tianjin, China. Ultrapure water obtained with Milli-Q® equipment was used in this study.

## Text S2 Synthesis of photocatalysts

2 g bagasse, 100 mL ultrapure water, and 10 mL absolute ethanol were added to a 500 mL beaker, the bagasse was filtered after sonication for 20 min, 150 mL ultrapure water, and 60 mL absolute ethanol, and placed on a magnetic stirrer. While vigorously stirring, 6 mL of titanium butoxide was added dropwise within 4 min, and then stirring vigorously for 30 min, the agitated bagasse and part of the solution were poured into a 100 mL Teflon-lined stainless steel autoclave and hydrothermally heated at 160°C for 24 h. After the hydrothermal material was suction filtered and rinsed three times with water and ethanol, it was moved to an oven for drying at 80°C. The dried material was transferred to a corundum boat, kept in a tube furnace (with hydrogen-argon mixture) at 400°C for 3 h (heating rate 10°C/min), and then cooled down naturally. The obtained material was named H<sub>2</sub>/T-BC.

Add 150 mL ultrapure water and 60 mL absolute ethanol, and place on a magnetic stirrer. While vigorously stirring, 6 mL of titanium butoxide was added dropwise within 4 min, after stirring vigorously for 30 min, the part of the solution was poured into a 100 mL Teflon-lined stainless steel autoclave and hydrothermally heated at 160°C for 24 h. After the hydrothermal material was suction filtered and rinsed three times with water and ethanol, it was moved to an oven for drying at 80°C. The dried material was moved into a corundum boat, kept in a tube furnace (with hydrogen-argon mixture) at 400°C for 3 h (heating rate 10°C/min), and then cooled down naturally. The obtained material was named H<sub>2</sub>/T.

2 g bagasse, 100 mL ultrapure water, and 10 mL absolute ethanol were added to a 500 mL beaker, the bagasse was filtered off after sonicating for 20 min, 150 mL ultrapure water and 60 mL absolute ethanol, and placed on a magnetic stirrer. After stirring vigorously for 30 min, the stirred bagasse and a portion of the solution were transferred to a 100 mL Teflon-lined stainless steel autoclave and hydrothermally heated at 160°C for 24 h. After the hydrothermal material was suction filtered and rinsed three times with water and ethanol, it was transferred to an oven for drying at 80°C. The dried material was moved into a corundum boat, kept in a tube furnace (with hydrogen-argon mixture) at 400°C for 3 h (heating rate 10°C/min), and then cooled down naturally. The obtained material was named H<sub>2</sub>/BC.

## Text S3 Characterization and Photoelectrochemical measurements

Scanning electron microscopy (SEM), energy dispersive spectrometer (EDS), and high-resolution transmission electron microscope (HRTEM) were performed on Zeiss Sigma 300, smartedx, and JEOL JEM-2800. The X-ray

diffraction (XRD) patterns of the samples were obtained using Bruker D8 Discover in the  $2\theta$  range of  $5-90^\circ$  and at a scan rate of  $5^\circ/\text{min}$  (Cu  $K\alpha$  source irradiation). Fourier transform infrared spectrometer (FTIR) was performed on Shimadzu IRTracer-100 (400 - 4000 nm). X-ray photoelectron spectroscopy (XPS) was performed using Thermo Scientific K-Alpha with an anode of Al  $K\alpha$  radiation (1486.6 eV) X-ray sources. UV-vis diffuse reflectance spectra (UV-vis DRS) were obtained with Shimadzu UV-3600Plus. Wavelength: 200 – 1000 nm. Tauc plot is mainly based on the formula proposed by Tauc, Davis and Mott et al.<sup>1</sup>:  $(\alpha h\nu)^{1/n} = B(h\nu - E_g)$ , where  $\alpha$  is absorption coefficient,  $h$  is Planck-constant,  $\nu$  is frequency,  $B$  is constant,  $E_g$  is the bandgap width of semiconductor, Exponential  $n$  is directly related to the type of semiconductor, direct bandgap  $n=1/2$ , indirect bandgap  $n=2$ . The type of transitions of  $H_2/T$  and  $H_2/T\text{-BC}$  are indirect,  $n=2$ . The surface charge (Zeta) was measured using zeta potential analyzer (NanoBrook Omni, Brookhaven, US). The measurements of Mott-Schottky plot (M-S), transient photocurrent (I-t), and electrochemical impedance spectroscopy (EIS) were performed using electrochemical workstation (Chenhua, CHI760E China).

The sample preparation method is as follows.

SEM: An appropriate amount of  $H_2/BC$  and  $H_2/T\text{-BC}$  was glued onto the conductive adhesive and sprayed with gold for 45 s (platinum target) using an Oxford Quorum SC7620 sputtering coater at 10 mA. TEM: An appropriate amount of  $H_2/T\text{-BC}$  was taken for sample preparation using a copper mesh (microgrid carbon film). XRD:  $H_2/T$ ,  $H_2/BC$ , and  $H_2/T\text{-BC}$  were milled and pressed separately. FTIR:  $H_2/T$ ,  $H_2/BC$ , and  $H_2/T\text{-BC}$  were mixed and ground separately with potassium bromide, and the ratio of sample to potassium bromide was approximately 1: 100. XPS:  $H_2/BC$  and  $H_2/T\text{-BC}$  were pressed separately and attached to the sample disk. UV-vis DRS: powder samples diluted with a non-absorbing material ( $BaSO_4$ ). Zeta: An equal amount of  $H_2/T\text{-BC}$  was weighed and transferred into a 50 mL cuvette, diluted with water and adjusted to pH 2, 4, 5, 7, 8 and 10 respectively. Ultrasonication was used to make the material fully dispersed in the solution, and after a period of natural settling, the supernatant was taken for determination. M-S, I-t, and EIS: Weigh 10 mg of  $H_2/T$ ,  $H_2/T\text{-BC}$  powder samples were dispersed in 1 mL of ethanol, then add 20  $\mu\text{L}$  of 5 % Nafion ethanol solution, sonicate for 30 min to form a suspension and then dispersed and coated on ITO substrate for drying.

#### **Text S4 Photocatalytic activity**

Conditions for TC determination: Mobile phase was V (0.01 mol/L oxalic acid): V (acetonitrile): V (methanol) = 7:2:1, flow rate of 0.35 mL/min, detection wavelength of 355 nm

Conditions for CIP determination: Mobile phase was V (0.025% phosphoric acid): V (acetonitrile)=87:13, the phosphoric acid solution was prepared and adjusted to pH=3 with triethylamine, flow rate of 0.35 mL/min, detection wavelength of 278 nm.

#### **Text S5 XPS**

The C 1s spectrum of  $H_2/BC$  was fitted with three peaks. The peak at 284.73 eV was attributed to the C-C bonds (adventitious carbon)<sup>2</sup>, which were common in biochar. The peaks at 285.57 eV and 289.19 eV were attributed

to the C-O bonds <sup>2</sup> and COOH/C=O bonds <sup>3</sup>, respectively. The O 1s spectrum of H<sub>2</sub>/BC can be fitted with two peaks at 531.83 eV and 533.21 eV, which were attributed to C-O bonds <sup>2</sup> and C=O bonds <sup>4</sup>, respectively.

### **Text S6 Zeta**

The isoelectric point of TiO<sub>2</sub> was at 6.2 <sup>5, 6</sup>, which showed that TiO<sub>2</sub> had a positively charged surface at pH < 6.2 and a negatively charged surface at pH > 6.2. The isoelectric point of bagasse ranged from 2.3 to 6.1 <sup>7-10</sup>.

Tab. S1. Fukui calculation results of TC molecular.

| Atoms | $f(e)$    | $f^+(e)$ | $f^0(e)$ | Atoms   | $f(e)$  | $f^+(e)$ | $f^0(e)$ |
|-------|-----------|----------|----------|---------|---------|----------|----------|
| C1    | 0.0397    | 0.0303   | 0.035    | C22     | 0.0038  | 0.0055   | 0.0046   |
| C6    | 0.0497    | 0.0199   | 0.0348   | C20     | 0.072   | 0.014    | 0.043    |
| C5    | 0.0456    | 0.0148   | 0.0302   | O25     | 0.0146  | 0.0062   | 0.0104   |
| C4    | 0.0413    | 0.0011   | 0.0212   | O28     | 0.0197  | 0.0292   | 0.0245   |
| C3    | 0.02      | 0.0088   | 0.0144   | H(C1)   | 0.0282  | 0.0176   | 0.0229   |
| C2    | 0.0059    | 0.0036   | 0.0048   | H(C6)   | 0.029   | 0.0151   | 0.0221   |
| C10   | 0.0097    | 0.0333   | 0.0215   | H(C2)   | 0.0298  | 0.0109   | 0.0204   |
| C9    | 0.0589    | 0.0171   | 0.038    | H(C8)   | 0.0156  | 0.0078   | 0.0117   |
| C8    | 0.0062    | 0.0028   | 0.0045   | H(C12)  | 0.003   | 0.0061   | 0.0046   |
| C7    | 0.0028    | 0.0013   | 0.0021   | H(C11)  | 0.0115  | 0.0119   | 0.0117   |
| C14   | 0.045     | 0.0112   | 0.0281   | H(C11)  | 0.0057  | 0.0063   | 0.006    |
| C13   | 0.0028    | 0.0091   | 0.006    | H(C15)  | 0.0072  | 0.0185   | 0.0129   |
| C12   | 6.00E-04  | 0.0021   | 0.0013   | H(O31)  | 0.02    | 0.0069   | 0.0134   |
| C11   | 0.0036    | 0.0057   | 0.0046   | H(O29)  | 0.0163  | 0.0099   | 0.0131   |
| C18   | -1.00E-04 | 0.082    | 0.041    | H(O32)  | 0.0086  | 0.0266   | 0.0176   |
| C17   | 0.0046    | 0.0355   | 0.0201   | H(N24)  | 0.0105  | 0.0205   | 0.0155   |
| C16   | 0.0094    | 0.0866   | 0.048    | H(N24)  | 0.0049  | 0.0074   | 0.0062   |
| C15   | 0.0025    | 0.0087   | 0.0056   | H(C21)  | 0.0076  | 0.0156   | 0.0116   |
| O31   | 0.0992    | 0.0228   | 0.061    | H(C21)  | -0.0015 | 0.0066   | 0.0025   |
| O30   | 0.0283    | 0.0407   | 0.0345   | H(C21)  | 0.0089  | 0.0132   | 0.0111   |
| O29   | 0.0655    | 0.02     | 0.0427   | H(C22)  | 0.0078  | 0.0174   | 0.0126   |
| O27   | 0.0092    | 0.0987   | 0.0539   | 50(C22) | 0.0015  | 3.00E-04 | 9.00E-04 |
| O32   | 0.0168    | 0.0565   | 0.0367   | H(C22)  | 0.0078  | 0.0099   | 0.0089   |
| C19   | 0.0062    | 0.0033   | 0.0047   | H(C20)  | 0.0104  | 0.0112   | 0.0108   |
| N24   | 0.0111    | 0.0163   | 0.0137   | H(C20)  | 0.0147  | 0.0041   | 0.0094   |
| O26   | 0.0321    | 0.0331   | 0.0326   | H(C20)  | 0.0025  | 0.0015   | 0.002    |
| N23   | 4.00E-04  | 0.0061   | 0.0032   | H(O25)  | 0.0115  | 0.0093   | 0.0104   |
| C21   | 0.0034    | 0.0103   | 0.0068   | H(O28)  | 0.008   | 0.0086   | 0.0083   |

Tab. S2. Fukui calculation results of CIP molecular.

| Atoms | $f(e)$ | $f^+(e)$ | $f^0(e)$ | Atoms | $f(e)$ | $f^+(e)$ | $f^0(e)$ |
|-------|--------|----------|----------|-------|--------|----------|----------|
| O22   | 0.0387 | 0.0427   | 0.0407   | C11   | 0.0192 | 0.0737   | 0.0465   |
| C14   | 0.0094 | 0.0122   | 0.0108   | O21   | 0.076  | 0.0851   | 0.0805   |

|     |         |          |           |        |        |          |        |
|-----|---------|----------|-----------|--------|--------|----------|--------|
| C12 | 0.0209  | 0.0278   | 0.0244    | O23    | 0.0237 | 0.031    | 0.0274 |
| C13 | 0.0181  | 0.0059   | 0.012     | H(C13) | 0.0162 | 0.0345   | 0.0253 |
| N20 | 0.0141  | 0.033    | 0.0236    | H(C15) | 0.0068 | 0.017    | 0.0119 |
| C15 | -0.0017 | 9.00E-04 | -4.00E-04 | H(C16) | 0.0076 | 0.0163   | 0.012  |
| C16 | 0.0061  | 0.0129   | 0.0095    | H(C16) | 0.0029 | 0.0067   | 0.0048 |
| C17 | 0.0145  | 0.0152   | 0.0149    | H(C17) | 0.0086 | 0.009    | 0.0088 |
| C9  | 0.0234  | 0.0138   | 0.0186    | H(C17) | 0.0142 | 0.0184   | 0.0163 |
| C8  | 0.0641  | 0.0115   | 0.0378    | H(C7)  | 0.0219 | 0.0297   | 0.0258 |
| C7  | 0.0271  | 0.0629   | 0.045     | H(C1)  | 0.0149 | 0.0053   | 0.0101 |
| C5  | 0.0508  | 0.0389   | 0.0448    | H(C1)  | 0.0262 | 0.0161   | 0.0211 |
| F   | 0.0398  | 0.0325   | 0.0361    | H(C2)  | 0.0143 | 5.00E-04 | 0.0074 |
| C6  | 0.021   | 0.0567   | 0.0388    | H(C2)  | 0.0251 | 0.0165   | 0.0208 |
| N18 | 0.1003  | 0.0238   | 0.0621    | H(N19) | 0.0253 | 0.0127   | 0.019  |
| C1  | 0.0185  | 0.0084   | 0.0135    | H(C3)  | 0.024  | 0.0148   | 0.0194 |
| C2  | 0.0193  | 0.0069   | 0.0131    | H(C3)  | 0.014  | 0        | 0.007  |
| N19 | 0.0353  | 0.0106   | 0.0229    | H(C4)  | 0.0275 | 0.0177   | 0.0226 |
| C3  | 0.0218  | 0.0864   | 0.0541    | H(C4)  | 0.0167 | 0.004    | 0.0103 |
| C4  | 0.0178  | 0.0071   | 0.0124    | H(C10) | 0.0155 | 0.0219   | 0.0187 |
| C10 | 0.0324  | 0.0484   | 0.0404    | H(O23) | 0.0075 | 0.0107   | 0.0091 |

---

## ETC (epitetracyclin)

Tab. S3. Potential intermediates in the TC photocatalytic degradation by H<sub>2</sub>/T-BC.

| TPs | m/z | Molecular formula                                             | Supposed Structure                                                                   | RSs/TPs<br>Pathway                                                      | Refs. |
|-----|-----|---------------------------------------------------------------|--------------------------------------------------------------------------------------|-------------------------------------------------------------------------|-------|
| P1  | 459 | C <sub>22</sub> H <sub>22</sub> N <sub>2</sub> O <sub>9</sub> | 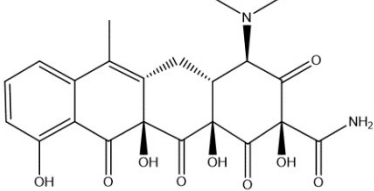   | ·O <sub>2</sub> <sup>-</sup> /ETC<br>Hydroxylation                      | 11    |
| P2  | 443 | C <sub>22</sub> H <sub>21</sub> N <sub>2</sub> O <sub>9</sub> |    | ·O <sub>2</sub> <sup>-</sup> /TC<br>1)Hydroxylation<br>2)Ring formation | 12    |
| P3  | 431 | C <sub>21</sub> H <sub>22</sub> N <sub>2</sub> O <sub>8</sub> |   | h <sup>+</sup> /ETC Demethylation                                       | 11    |
| P4  | 428 | C <sub>22</sub> H <sub>21</sub> N <sub>2</sub> O <sub>8</sub> |  | ·O <sub>2</sub> <sup>-</sup> /TC<br>Hydroxylation                       | 12    |
| P5  | 427 | C <sub>23</sub> H <sub>25</sub> N <sub>2</sub> O <sub>7</sub> |  | ·O <sub>2</sub> <sup>-</sup> /ETC<br>Aromatization                      | 11    |
| P6  | 399 | C <sub>20</sub> H <sub>18</sub> N <sub>2</sub> O <sub>7</sub> |  | h <sup>+</sup> /P5<br>Demethylation                                     | 11    |



|     |     |           |                                                                                      |                                                        |    |
|-----|-----|-----------|--------------------------------------------------------------------------------------|--------------------------------------------------------|----|
| P7  | 398 | C21H19NO7 | 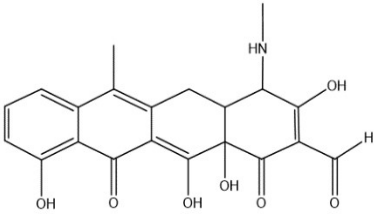   | RSs/P2<br>Decompose                                    | 12 |
| P9  | 301 | C18H20O4  |    | RSs/P2, P7<br>Disintegrated                            | 12 |
| P10 | 282 | C18H18O3  |    | h <sup>+</sup><br>1)Dehydroxylation<br>2)Demethylation | 13 |
| P11 | 239 | C12H14O5  |  | RSs/P356<br>Ring opening                               | 11 |
| P13 | 135 | C8H6O3    |   | RSs/P2, P7<br>Disintegrated                            | 12 |
| P14 | 130 | C8H18O    |  | RSs/TPs<br>The cleavage of TPs                         | 14 |

Tab. S4. Potential intermediates in the TC photocatalytic degradation by H<sub>2</sub>/T-BC under acidic conditions.

| TPs | m/z | Molecular formula                              | Supposed Structure | RSs/TPs<br>Pathway         | Refs. |
|-----|-----|------------------------------------------------|--------------------|----------------------------|-------|
| P15 | 324 | C <sub>19</sub> H <sub>14</sub> O <sub>5</sub> |                    | RSs/P3 5 6<br>Ring opening | 11    |

Tab. S5. Potential intermediates in the TC photocatalytic degradation by H<sub>2</sub>/T-BC under neutral conditions.

| TPs | m/z | Molecular formula                                             | Supposed Structure | RSs/TPs<br>Pathway                                                                      | Refs. |
|-----|-----|---------------------------------------------------------------|--------------------|-----------------------------------------------------------------------------------------|-------|
| P16 | 417 | C <sub>20</sub> H <sub>20</sub> N <sub>2</sub> O <sub>8</sub> |                    | h <sup>+</sup> /ETC<br>Demethylation                                                    | 11    |
| P17 | 415 | C <sub>20</sub> H <sub>18</sub> N <sub>2</sub> O <sub>8</sub> |                    | h <sup>+</sup> +·O <sub>2</sub> <sup>-</sup> /ETC<br>1)Hydroxylation<br>2)Demethylation | 11    |
| P18 | 385 | C <sub>21</sub> H <sub>23</sub> N <sub>2</sub> O <sub>6</sub> |                    | h <sup>+</sup><br>1)Dehydroxylation<br>2)Demethylation                                  | 13    |
| P15 | 324 | C <sub>19</sub> H <sub>14</sub> O <sub>5</sub>                |                    | RSs/P3 5 6<br>Ring opening                                                              | 11    |

|     |     |                                                 |                                                                                    |                                                                      |    |
|-----|-----|-------------------------------------------------|------------------------------------------------------------------------------------|----------------------------------------------------------------------|----|
| P19 | 296 | C <sub>18</sub> H <sub>17</sub> NO <sub>3</sub> | 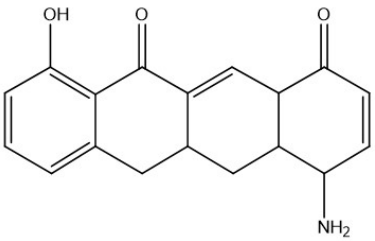 | h <sup>+</sup> /TC<br>Detachment of functional groups of TC molecule | 15 |
| P20 | 136 | C <sub>9</sub> H <sub>12</sub> O                |   | RSs/TPs<br>The cleavage of tetracycline                              | 14 |

Tab. S6. Potential intermediates in the TC photocatalytic degradation by H<sub>2</sub>/T-BC under alkalinity conditions.

| TPs | m/z | Molecular formula                                             | Supposed Structure                                                                   | RSs/TPs Pathway                                                                        | Refs. |
|-----|-----|---------------------------------------------------------------|--------------------------------------------------------------------------------------|----------------------------------------------------------------------------------------|-------|
| P16 | 417 | C <sub>20</sub> H <sub>20</sub> N <sub>2</sub> O <sub>8</sub> |   | h <sup>+</sup> /ETC<br>Demethylation                                                   | 11    |
| P17 | 415 | C <sub>20</sub> H <sub>18</sub> N <sub>2</sub> O <sub>8</sub> |  | h <sup>+</sup> +O <sub>2</sub> <sup>-</sup> /ETC<br>1)Hydroxylation<br>2)Demethylation | 11    |
| P21 | 410 | C <sub>22</sub> H <sub>21</sub> NO <sub>7</sub>               |  | h <sup>+</sup> /P4<br>Dehydroxylation                                                  | 12    |
| P18 | 385 | C <sub>21</sub> H <sub>23</sub> NO <sub>6</sub>               |  | h <sup>+</sup><br>1)Dehydroxylation<br>2)Demethylation                                 | 13    |

|     |     |           |                                                                                    |                                                                      |    |
|-----|-----|-----------|------------------------------------------------------------------------------------|----------------------------------------------------------------------|----|
| P19 | 296 | C18H17NO3 |  | h <sup>+</sup> /TC<br>Detachment of functional groups of TC molecule | 15 |
| P20 | 136 | C9H12O    |   | RSs/TPs<br>The cleavage of tetracycline                              | 14 |

Tab. S7. Potential intermediates in the CIP photocatalytic degradation by H<sub>2</sub>/T-BC.

| TPs | m/z | Molecular formula | Supposed Structure                                                                   | RSs/TPs Pathway                                                                                   | Refs. |
|-----|-----|-------------------|--------------------------------------------------------------------------------------|---------------------------------------------------------------------------------------------------|-------|
| P1  | 362 | C17H16FN3O5       | 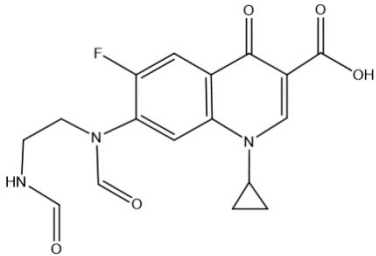  | RSs/CIP<br>1)The cleavage of the piperazine ring<br>2)With two keto-groups on the piperazine ring | 16    |
| P3  | 263 | C13H11FN2O3       |  | RSs/P1<br>Detachment of functional groups of CIP molecule                                         | 16    |

Tab. S8. Potential intermediates in the CIP photocatalytic degradation by H<sub>2</sub>/T-BC under acidic conditions.

| TPs | m/z | Molecular formula | Supposed Structure | RSs/TPs Pathway | Refs. |
|-----|-----|-------------------|--------------------|-----------------|-------|
|-----|-----|-------------------|--------------------|-----------------|-------|

|    |     |            |    |  |                                       |    |
|----|-----|------------|----|--|---------------------------------------|----|
|    |     |            |    |  |                                       |    |
| P4 | 334 | C16H19N3O5 | or |  | $h^{+}+{}^1O_2/P1$<br>Decarbonylation | 17 |

Tab. S9. Potential intermediates in the CIP photocatalytic degradation by  $H_2/T$ -BC under neutral conditions.

| TPs | m/z | Molecular formula | Supposed Structure | RSs/TPs<br>Pathway                                                               | Refs. |
|-----|-----|-------------------|--------------------|----------------------------------------------------------------------------------|-------|
| P5  | 344 | C17H17N3O5        |                    | $h^{+}+{}^1O_2/CIP$<br>1)The cleavage of the piperazine ring<br>2)Defluorination | 18    |
| P6  | 316 | C16H17N3O4        |                    | $h^{+}/P6$<br>Decarbonylation                                                    | 18    |
| P7  | 330 | C17H19N3O4        |                    | $h^{+}+O_2^{-}/CIP$<br>1)Defluorination<br>2)Hydroxylation<br>3)Dehydroxylation  | 18    |

|    |     |                                                               |  |                                                                     |    |
|----|-----|---------------------------------------------------------------|--|---------------------------------------------------------------------|----|
| P8 | 288 | C <sub>15</sub> H <sub>17</sub> N <sub>3</sub> O <sub>3</sub> |  | h <sup>+</sup> + <sup>1</sup> O <sub>2</sub> /P7<br>Decarbonylation | 18 |
|----|-----|---------------------------------------------------------------|--|---------------------------------------------------------------------|----|

Tab. S10. Potential intermediates in the CIP photocatalytic degradation by H<sub>2</sub>/T-BC under alkalinity conditions.

| TPs | m/z | Molecular formula                                               | Supposed Structure | RSs/TPs<br>Pathway                                                                                           | Refs. |
|-----|-----|-----------------------------------------------------------------|--------------------|--------------------------------------------------------------------------------------------------------------|-------|
| P9  | 348 | C <sub>17</sub> H <sub>18</sub> FN <sub>3</sub> O <sub>4</sub>  |                    | ·O <sub>2</sub> <sup>-</sup> /CIP Hydroxylation                                                              | 16    |
| P7  | 330 | C <sub>17</sub> H <sub>19</sub> N <sub>3</sub> O <sub>4</sub>   |                    | h <sup>+</sup> +O <sub>2</sub> <sup>-</sup> /CIP<br>1)Defluorination<br>2)Hydroxylation<br>3)Dehydroxylation | 18    |
| P6  | 316 | C <sub>16</sub> H <sub>17</sub> N <sub>3</sub> O <sub>4</sub>   |                    | h <sup>+</sup> + <sup>1</sup> O <sub>2</sub> /P1<br>1)Defluorination<br>2)Decarbonylation                    | 18    |
| P10 | 306 | C <sub>15</sub> H <sub>16</sub> N <sub>3</sub> O <sub>3</sub> F |                    | h <sup>+</sup> + <sup>1</sup> O <sub>2</sub> /P1<br>Decarbonylation                                          | 16    |

P11 291 C14H11FN2O4 h<sup>+</sup>/P11 17

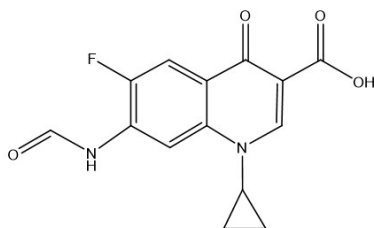

The cleavage of the piperazine ring

P8 288 C15H17N3O3 h<sup>+</sup>/P11 18

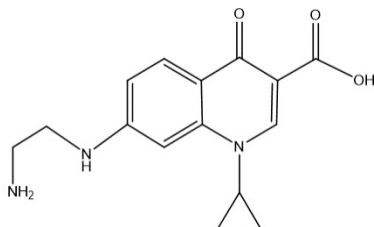

Defluorination

P12 280 C14H18N3O2F h<sup>+</sup>+<sup>1</sup>O<sub>2</sub>/P11 17

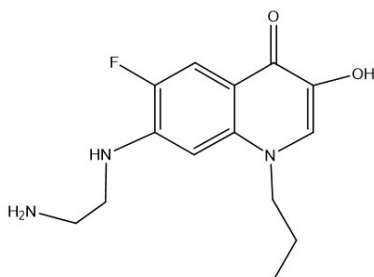

piperazine ring and cyclopropyl were broken

Tab. S11 Contribution rates of active species for organic pollutants degradation.

|    |          | pH | k       | Contribution rate% |     | pH | k       | Contribution rate% |
|----|----------|----|---------|--------------------|-----|----|---------|--------------------|
|    |          |    |         |                    |     |    |         |                    |
| TC | -        | 3  | 0.01218 | 100                | CIP | 3  | 0.00135 | 100                |
|    |          | 7  | 0.01296 | 100                |     | 7  | 0.00927 | 100                |
|    |          | 10 | 0.00949 | 100                |     | 10 | 0.1027  | 100                |
|    | EDTA-2Na | 3  | 0.01218 | 98.36              |     | 3  | 0.00135 | 92.59              |
|    |          | 7  | 0.01296 | 82.25              |     | 7  | 0.00927 | 94.61              |
|    |          | 10 | 0.00949 | 94.73              |     | 10 | 0.1027  | 99.61              |
|    | KBrO3    | 3  | 0.01218 | 80.30              |     | 3  | 0.00135 | 11.11              |
|    |          | 7  | 0.01296 | 77.62              |     | 7  | 0.00927 | 21.25              |
|    |          | 10 | 0.00949 | 32.56              |     | 10 | 0.1027  | 71.76              |
|    | TBA      | 3  | 0.01218 | 96.72              |     | 3  | 0.00135 | 77.78              |
|    |          | 7  | 0.01296 | 45.99              |     | 7  | 0.00927 | 13.70              |
|    |          | 10 | 0.00949 | 37.83              |     | 10 | 0.1027  | 64.95              |
|    | P-BQ     | 3  | 0.01218 | 98.36              |     | 3  | 0.00135 | 77.78              |
|    |          | 7  | 0.01296 | 59.10              |     | 7  | 0.00927 | 24.49              |
|    |          | 10 | 0.00949 | 62.07              |     | 10 | 0.1027  | 97.08              |
|    | DABCO    | 3  | 0.01218 | 53.20              |     | 3  | 0.00135 | 62.96              |
|    |          | 7  | 0.01296 | 46.76              |     | 7  | 0.00927 | 97.84              |
|    |          | 10 | 0.00949 | 34.67              |     | 10 | 0.1027  | 99.03              |

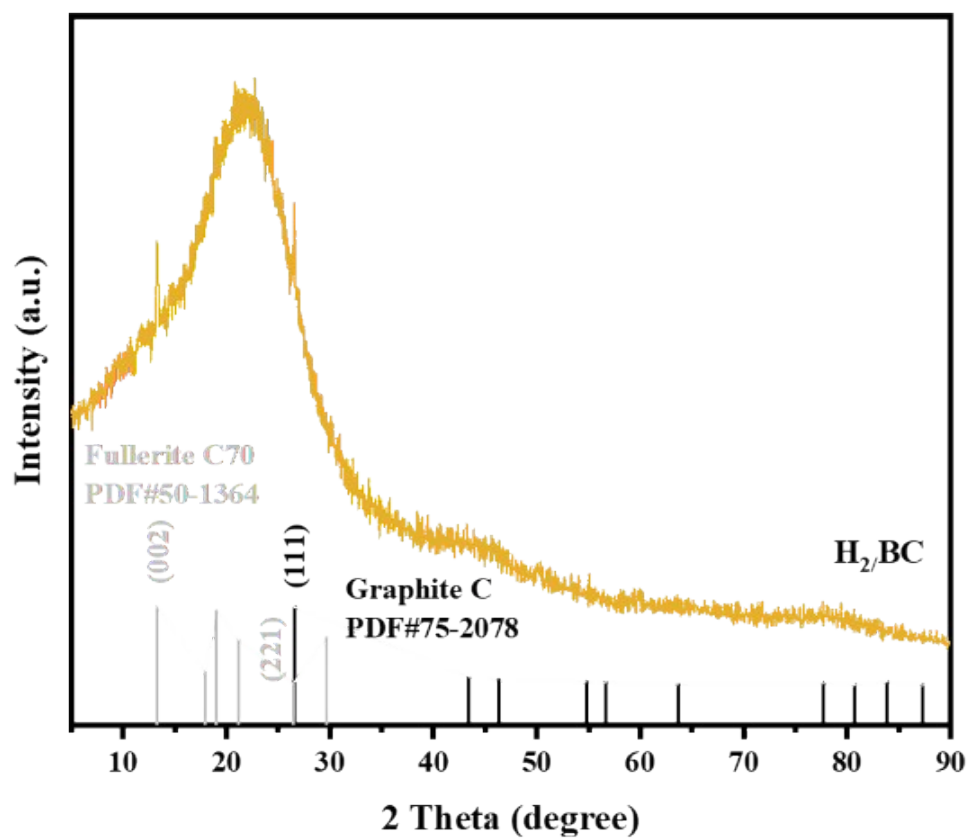

Fig. S1. XRD of H<sub>2</sub>/BC.



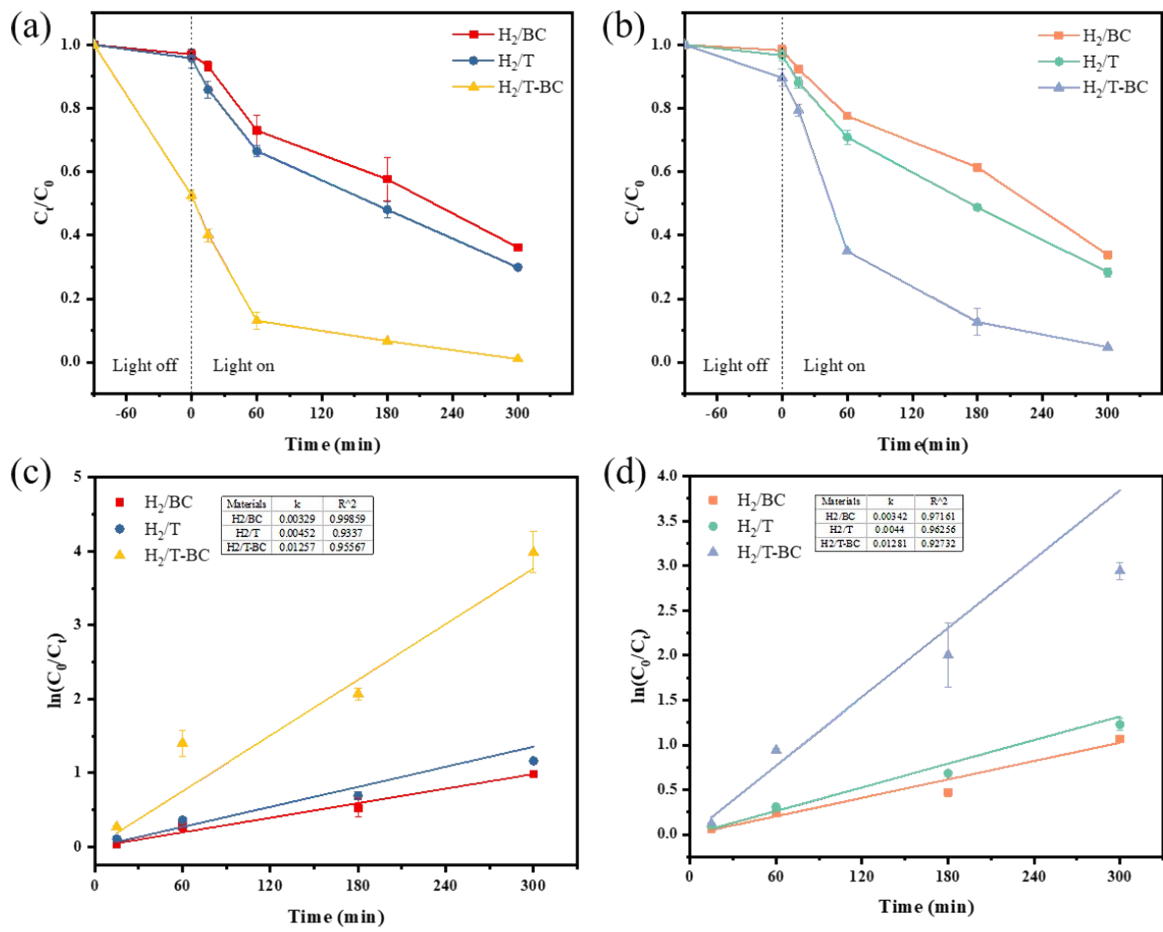

Fig. S2. Effect of different materials on degrading (a) TC, (b) CIP, and the reaction rate of (c)TC, (d) CIP.

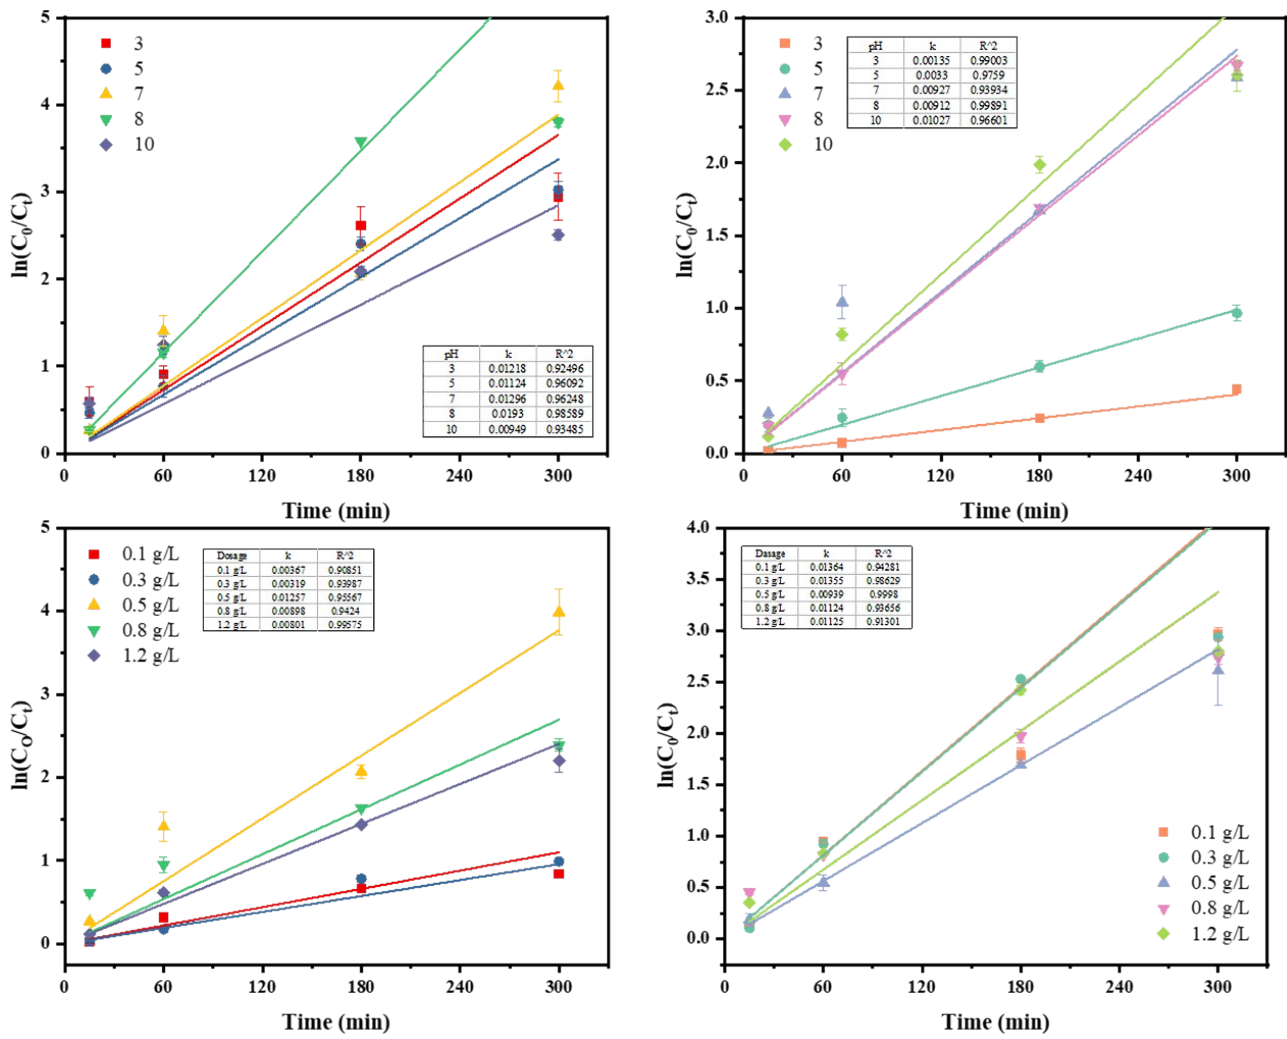

Fig. S3. The reaction rate of (a) TC, (b) CIP at different pH, and (c)TC, (d) CIP at different dosages of H<sub>2</sub>T-BC.

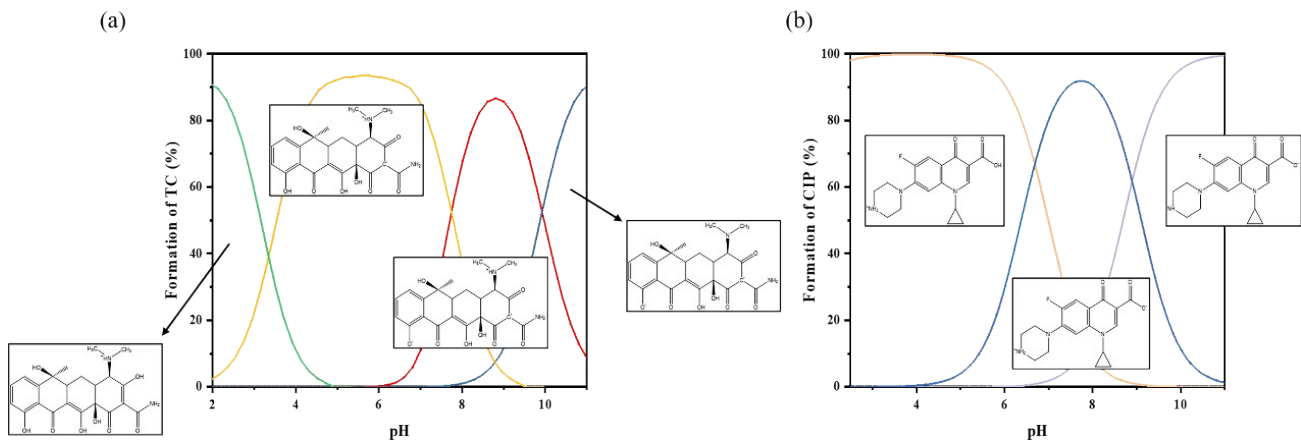

Fig. S4. The pKa of (a) TC and (b) CIP: The surface charge of antibiotics under different pH conditions.

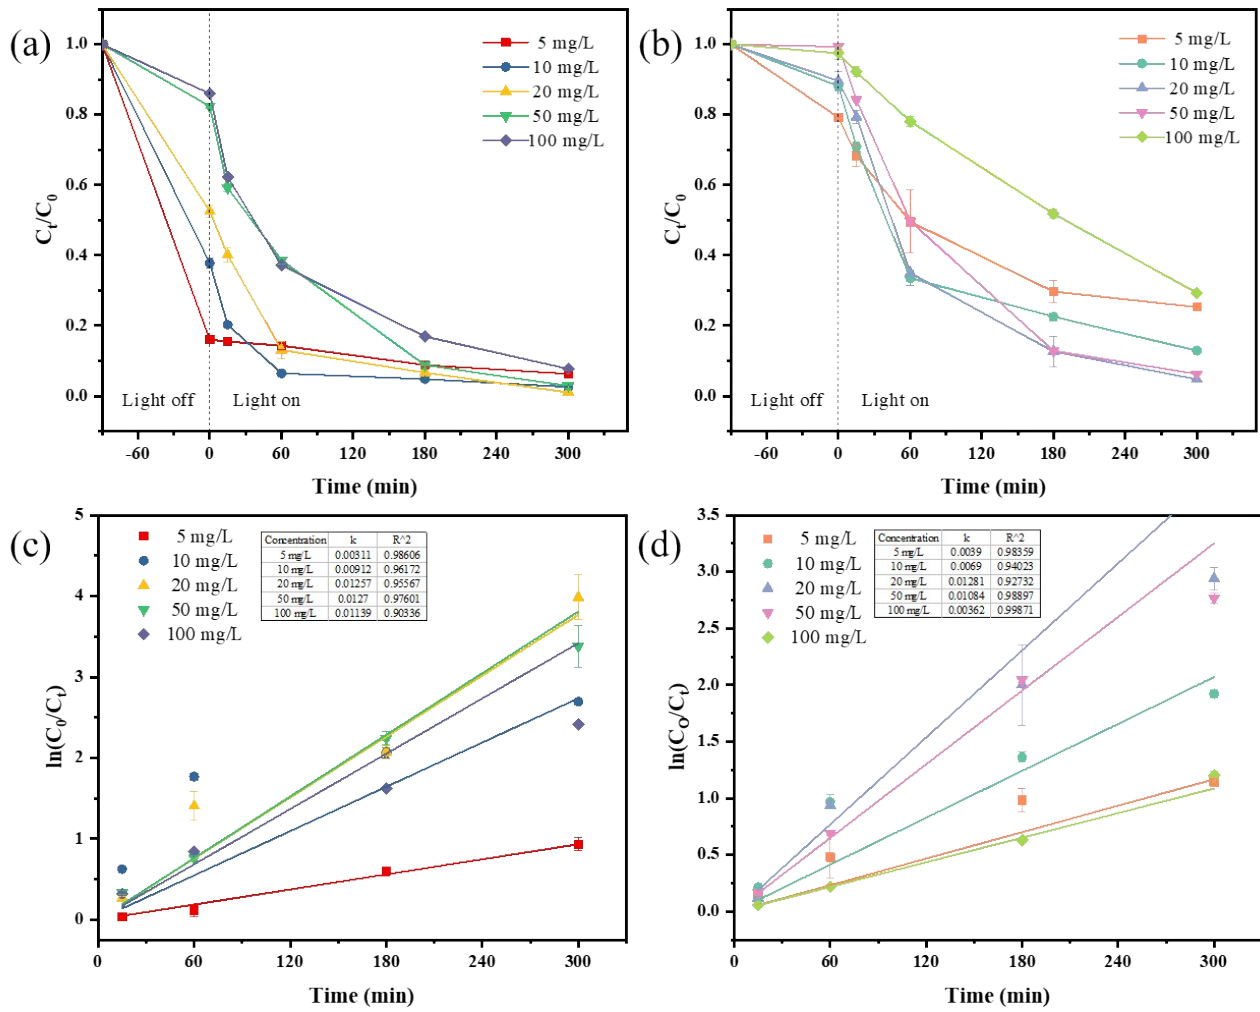

Fig. S5. Degradation of (a) TC, (b) CIP at different initial concentrations, and the reaction rate of (c)TC, (d) CIP.

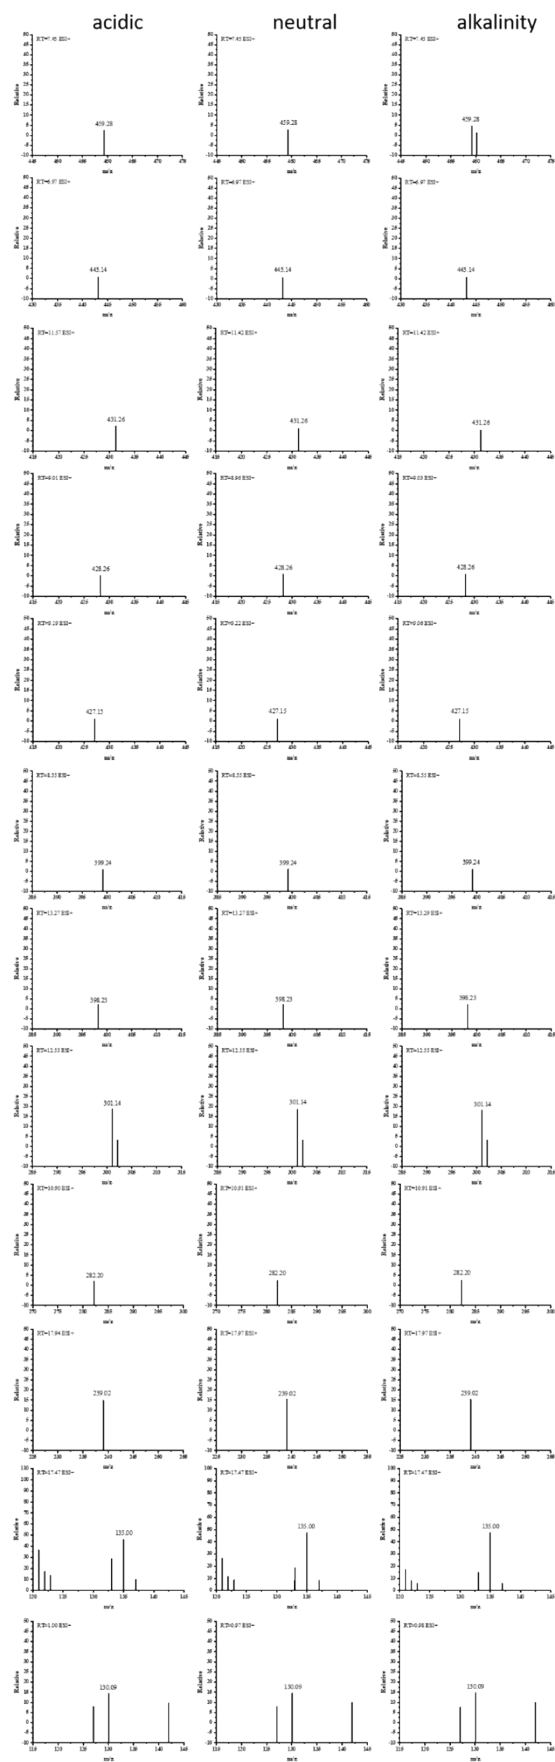

Fig. S6. MS<sup>2</sup> spectra of intermediate products resulting from TC photocatalytic degradation

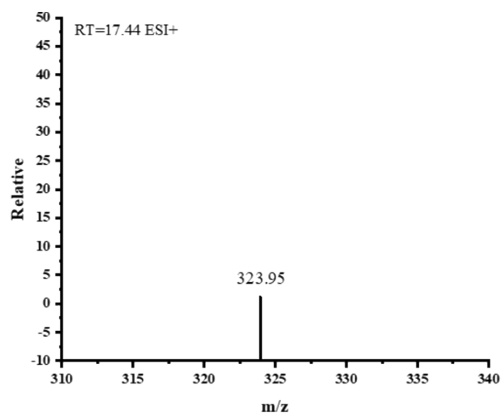

Fig. S7. MS<sup>2</sup> spectra of intermediate products resulting from TC photocatalytic degradation under acidic conditions.

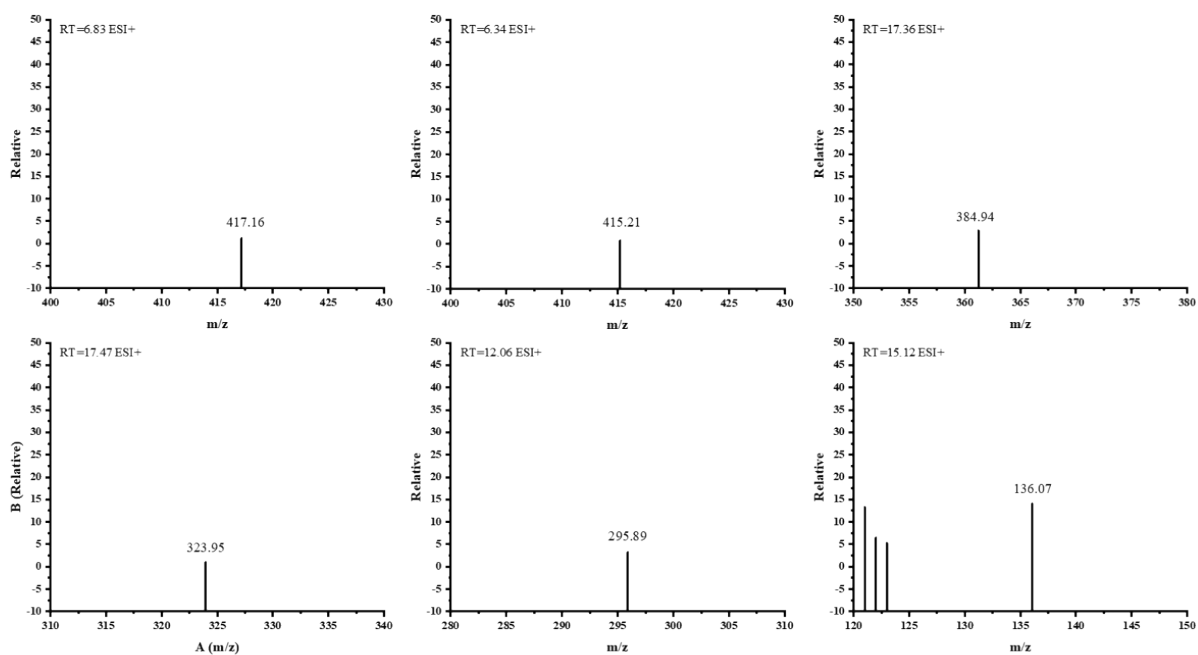

Fig. S8. MS<sup>2</sup> spectra of intermediate products resulting from TC photocatalytic degradation under neutral conditions.

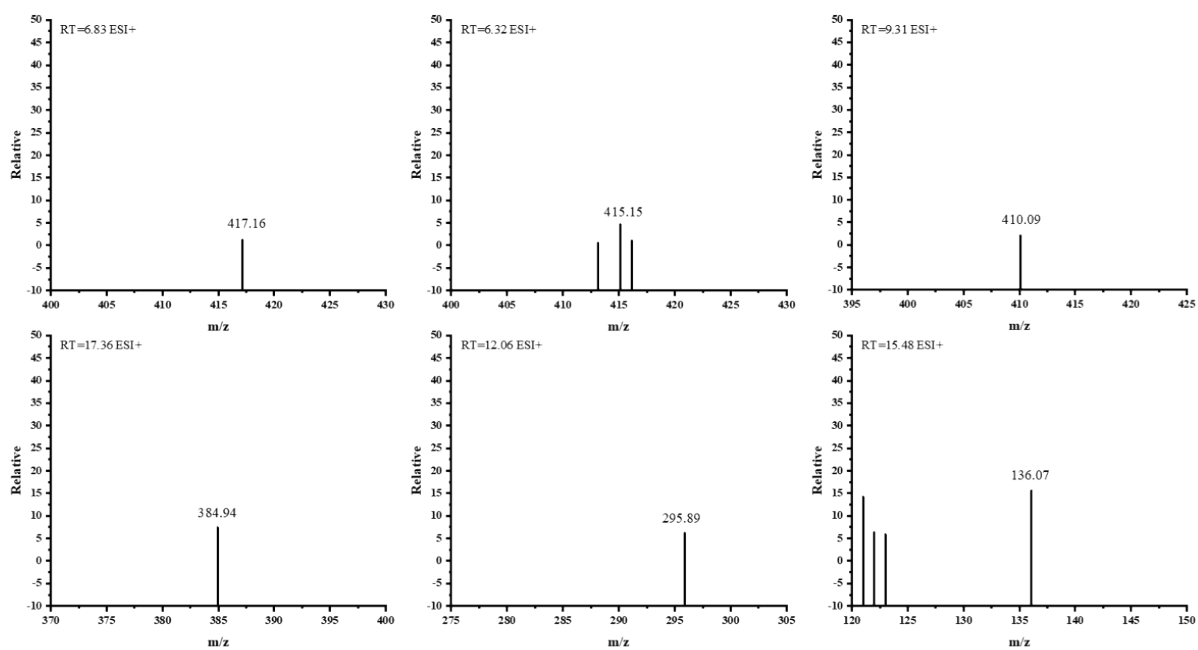

Fig. S9. MS<sup>2</sup> spectra of intermediate products resulting from TC photocatalytic degradation under alkaline conditions.

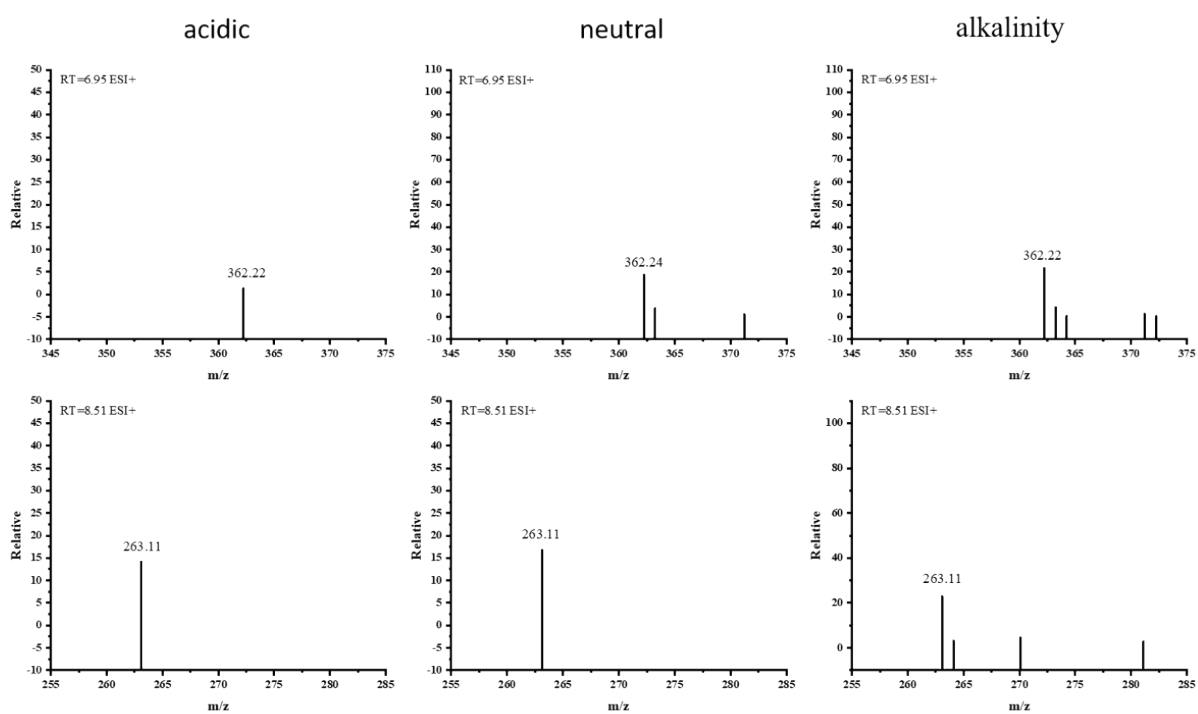

Fig. S10. MS<sup>2</sup> spectra of intermediate products resulting from CIP photocatalytic degradation

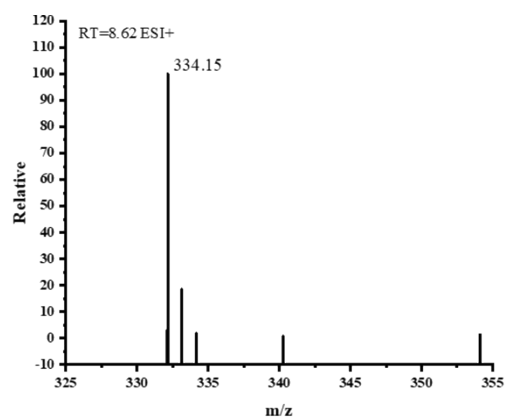

Fig. S11. MS<sup>2</sup> spectra of intermediate products resulting from CIP photocatalytic degradation under acidic conditions.

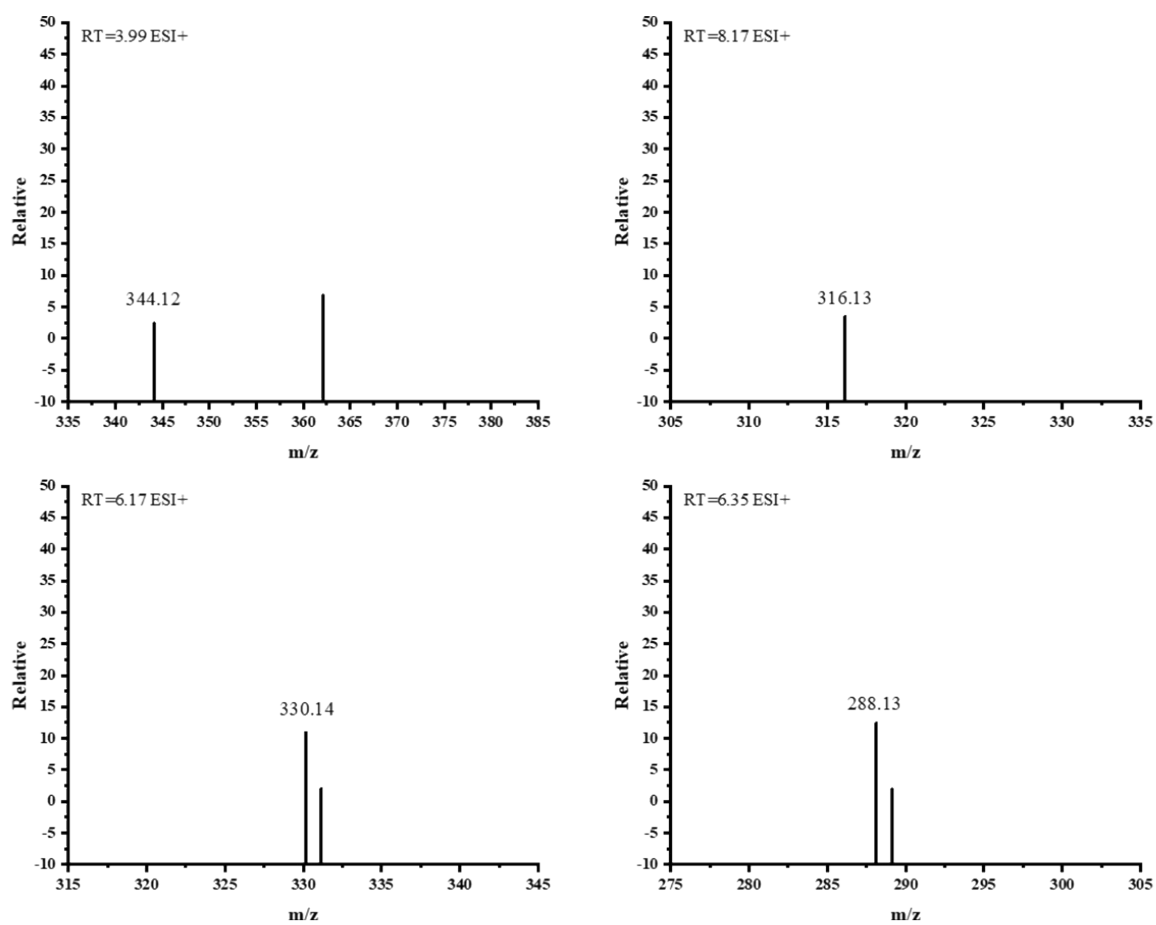

Fig. S12. MS<sup>2</sup> spectra of intermediate products resulting from CIP photocatalytic degradation under neutral conditions.

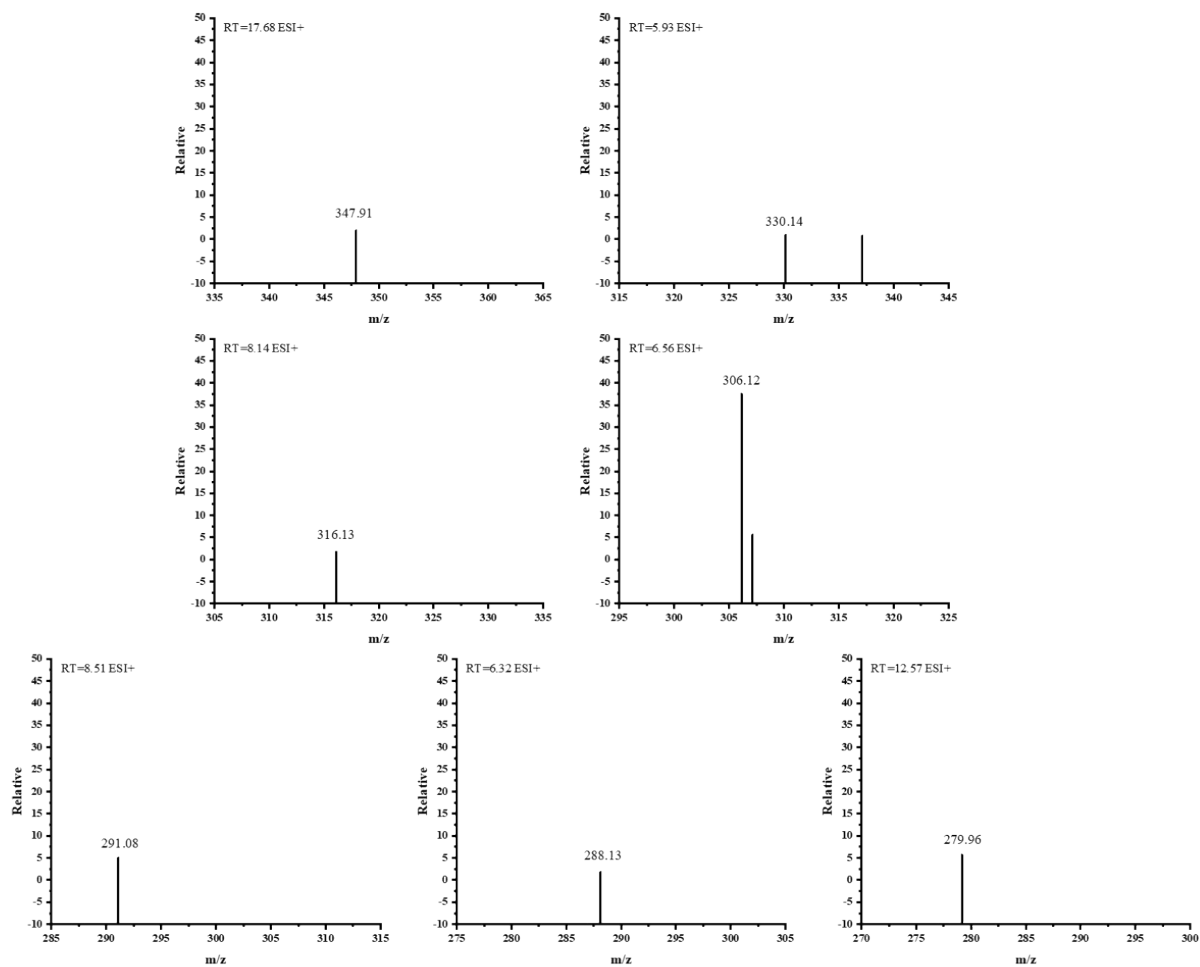

Fig. S13. MS<sup>2</sup> spectra of intermediate products resulting from CIP photocatalytic degradation under alkaline conditions.



## References

1. J. Tauc, *Journal*, 1972.
2. G. Jia, Y. Wang, X. Cui and W. Zheng, *ACS Sustainable Chemistry & Engineering*, 2018, **6**, 13480-13486.
3. T. T. a. A. ISHITANI, *Carbon*, 1984, **22**, 43-46.
4. M. Smith, L. Scudiero, J. Espinal, J.-S. McEwen and M. Garcia-Perez, *Carbon*, 2016, **110**, 155-171.
5. T. A. Gad-Allah, M. E. Ali and M. I. Badawy, *J Hazard Mater*, 2011, **186**, 751-755.
6. T. An, H. Yang, G. Li, W. Song, W. J. Cooper and X. Nie, *Applied Catalysis B: Environmental*, 2010, **94**, 288-294.
7. R.-y. Zhou, J.-x. Yu, H.-x. Li and R.-a. Chi, *Colloids and Surfaces A: Physicochemical and Engineering Aspects*, 2020, **603**.
8. J. X. Yu, J. Zhu, L. Y. Feng and R. A. Chi, *J Colloid Interface Sci*, 2015, **451**, 153-160.
9. Z. Zhang, L. Moghaddam, I. M. O'Hara and W. O. S. Doherty, *Chemical Engineering Journal*, 2011, **178**, 122-128.
10. T. E. Abilio, B. C. Soares, J. C. Jose, P. A. Milani, G. Labuto and E. Carrilho, *Environ Sci Pollut Res Int*, 2021, **28**, 24816-24829.
11. Q. Zhang, L. Jiang, J. Wang, Y. Zhu, Y. Pu and W. Dai, *Applied Catalysis B: Environmental*, 2020, **277**.
12. Q. Si, W. Guo, H. Wang, B. Liu, S. Zheng, Q. Zhao, H. Luo, N. Ren and T. Yu, *Applied Catalysis B: Environmental*, 2021, **299**.
13. L. Qin, Z. Wang, Y. Fu, C. Lai, X. Liu, B. Li, S. Liu, H. Yi, L. Li, M. Zhang, Z. Li, W. Cao and Q. Niu, *J Hazard Mater*, 2021, **414**, 125448.
14. V. H. Tran Thi and B. K. Lee, *J Hazard Mater*, 2017, **324**, 329-339.
15. Y. X. Pang, L. J. Kong, H. Y. Lei, D. Y. Chen and G. Yuvaraja, *JOURNAL OF THE TAIWAN INSTITUTE OF CHEMICAL ENGINEERS*, 2018, **93**, 397-404.
16. K. Hu, R. Li, C. Ye, A. Wang, W. Wei, D. Hu, R. Qiu and K. Yan, *Journal of Cleaner Production*, 2020, **253**.
17. F. Wang, X. Yu, M. Ge and S. Wu, *Chemical Engineering Journal*, 2020, **384**.
18. A. Salma, S. Thoroe-Boveleth, T. C. Schmidt and J. Tuerk, *J Hazard Mater*, 2016, **313**, 49-59.
